# Supplementary material for: Ancient DNA and high-resolution chronometry reveal a long-term human role in the historical diversity and biogeography of the Bahamian hutia
Source: PubMed Central journal article supplement (PMC6987171; doi:10.1038/s41598-020-58224-y), 2020-01-28
Supplement: 41598_2020_58224_MOESM2_ESM.pdf [file 41598_2020_58224_MOESM2_ESM.pdf]

Supplementary Material for

Ancient DNA and high-resolution chronometry reveal a long-term human role in the historical  
diversity and biogeography of the Bahamian hutia

Jessica A. Oswald<sup>1,2\*</sup>, Julie M. Allen<sup>2,3</sup>, Michelle J. LeFebvre<sup>1</sup>, Brian J. Stucky<sup>1</sup>, Ryan A. Folk<sup>1,4</sup>,  
Nancy A. Albury<sup>5</sup>, Gary S. Morgan<sup>6</sup>, Robert P. Guralnick<sup>1</sup>, David W. Steadman<sup>1</sup>

1. Florida Museum of Natural History, University of Florida, Gainesville, FL 32611
2. Biology Department, University of Nevada Reno, Reno, NV 89557
3. Illinois Natural History Survey, University of Illinois Urbana-Champaign, Urbana, IL 61801
4. Department of Biological Sciences, Mississippi State University, Starkville, MS 39762
5. National Museum of The Bahamas, Marsh Harbour, Abaco, The Bahamas.
6. New Mexico Museum of Natural History, 1801 Mountain Road NW, Albuquerque, NM 87104

\*Correspondence: Jessica A. Oswald, 1659 Museum Road, Dickinson Hall, University of Florida, Gainesville, FL 32601. Email: [oswaldj3@gmail.com](mailto:oswaldj3@gmail.com).

This PDF file includes

Supplementary Tables 1-4

Supplementary Figures 1-4

**Table S1.** Radiocarbon ( $^{14}\text{C}$ ) and stable isotope ( $\delta^{13}\text{C}$ ,  $\delta^{15}\text{N}$ ) data for individual bones of hutia (*Geocapromys ingrahami*) from the Bahamian Archipelago, proceeding roughly north-to-south in the island group. Beta-24481 is an old, time-averaged date determined on multiple bones (Morgan 1989). **Banks:** CAB, Crooked-Acklins Bank; CB, Caicos Bank; GBB, Great Bahama Bank; LBB, Little Bahama Bank; MB, Mayaguana Bank. **Site type:** (C), cultural site; (NC), non-cultural site.  $^{14}\text{C}$  ages presented at 95.4% confidence ( $2\sigma$ ). All analyses done at Beta Analytic Inc., Miami, FL. \*\*, sample used successfully for aDNA extraction and is listed with associated UF FLMNH catalog number. \*, sample used for aDNA extraction but did not yield a sequence.  $\delta^{13}\text{C}$  and  $\delta^{15}\text{N}$  are reported in per mille (o/oo). In the  $^{14}\text{C}$  age (cal BP) column “post-0” means that the sample retains enough  $^{14}\text{C}$  in it that it cannot (with statistical certainty) be distinguished from 0 (set at AD 1950).

| Bank | Island | Site                       | Skeletal element     | Beta-number | Conventional $^{14}\text{C}$ age (yr BP) | $\delta^{13}\text{C}$ (o/oo) | $^{14}\text{C}$ age (cal BP) | $^{14}\text{C}$ age (cal BC/AD)         | $\delta^{15}\text{N}$ (o/oo) |
|------|--------|----------------------------|----------------------|-------------|------------------------------------------|------------------------------|------------------------------|-----------------------------------------|------------------------------|
| LBB  | Abaco  | Hole-in-the-Wall Cave (NC) | Ulna                 | 411061      | 200 ± 30                                 | -20.7                        | 300-265, 220-140, 25-post 0  | 1650-1685, 1730-1810, 1925-post 1950 AD | +5.9                         |
| LBB  | Abaco  | Hole-in-the-Wall Cave (NC) | Femur                | 411060      | 280 ± 30                                 | -19.2                        | 430-355, 330-285             | 1520-1595, 1620-1665 AD                 | +7.2                         |
| LBB  | Abaco  | Hole-in-the-Wall Cave (NC) | **Femur (UF 322959)  | 520445      | 320 ± 30                                 | -19.5                        | 468-304                      | 1482-1646 AD                            | +7.9                         |
| LBB  | Abaco  | Ralph’s Cave (NC)          | **Sacrum (UF 322961) | 502523      | 420 ± 30                                 | -21.5                        | 524-435, 352-332             | 1426-1515, 1598-1618 AD                 | +3.9                         |

|     |                |                  |                      |        |             |       |                                 |                                             |      |
|-----|----------------|------------------|----------------------|--------|-------------|-------|---------------------------------|---------------------------------------------|------|
| GBB | Eleuthera      | Garden Cave (NC) | Femur                | 330400 | 290 ± 30    | -20.1 | 450-450,<br>440-350,<br>330-290 | 1500-1500,<br>1510-1600,<br>1620-1660<br>AD | +6.1 |
| GBB | Eleuthera      | Garden Cave (NC) | Ulna                 | 338513 | 1390 ± 30   | -19.9 | 1340-<br>1280                   | 610-670 AD                                  | +7.1 |
| GBB | Eleuthera      | Garden Cave (NC) | **Sacrum (UF 322948) | 520443 | 2000 ± 30   | -19.8 | 2033-<br>2029,<br>2004-<br>1880 | 84-80 BC, 55<br>BC – 70 AD                  | +6.3 |
| GBB | Eleuthera      | Garden Cave (NC) | Femur                | 330401 | 2180 ± 30   | -19.1 | 2350-<br>2300,<br>2240-<br>2180 | 400-350,<br>290-230 BC                      | +6.9 |
| GBB | Eleuthera      | Garden Cave (NC) | Femur                | 330404 | 3980 ± 30   | -18.9 | 4520-<br>4460,<br>4450-<br>4410 | 2570-2510,<br>2550-2460<br>BC               | +7.5 |
| GBB | Eleuthera      | Garden Cave (NC) | Humerus              | 330403 | 4270 ± 30   | -19.3 | 4860-<br>4830                   | 2910-2880<br>BC                             | +7.0 |
| GBB | Eleuthera      | Garden Cave (NC) | **Tibia (UF 322947)  | 520442 | 5270 ± 30   | -19.5 | 6180-<br>6144,<br>6125-<br>5939 | 4231-4195,<br>4176-3990<br>BC               | +7.3 |
| GBB | New Providence | Banana Hole (NC) | Various bones        | 24481  | 7980 ± 230  | ---   | 9432-<br>8392                   | ---                                         | ---  |
| GBB | New Providence | Banana Hole (NC) | Femur                | 432277 | No collagen | ---   | ---                             | ---                                         | ---  |
| GBB | New Providence | Banana Hole (NC) | Femur                | 432278 | No collagen | ---   | ---                             | ---                                         | ---  |

|     |             |                                         |                           |        |             |       |                     |                               |      |
|-----|-------------|-----------------------------------------|---------------------------|--------|-------------|-------|---------------------|-------------------------------|------|
| GBB | Long Island | Hanging Garden<br>Crawl Through<br>Cave | Femur                     | 494888 | No collagen | ---   | ---                 | ---                           | ---  |
| GBB | Long Island | Hanging Garden<br>Crawl Through<br>Cave | Femur                     | 494889 | No collagen | ---   | ---                 | ---                           | ---  |
| GBB | Long Island | Hanging Garden<br>Crawl Through<br>Cave | Femur                     | 494890 | No collagen | ---   | ---                 | ---                           | ---  |
| GBB | Long Island | Hanging Garden<br>Crawl Through<br>Cave | Femur                     | 494891 | No collagen | ---   | ---                 | ---                           | ---  |
| GBB | Long Island | Hanging Garden<br>Crawl Through<br>Cave | Femur                     | 494892 | No collagen | ---   | ---                 | ---                           | ---  |
| GBB | Long Island | Hanging Garden<br>Crawl Through<br>Cave | Femur                     | 494893 | No collagen | ---   | ---                 | ---                           | ---  |
|     |             |                                         |                           |        |             |       |                     |                               |      |
| CAB | Crooked     | Crossbed Cave                           | Ulna                      | 411055 | 330 ± 30    | -20.1 | 485-305             | 1465-1645<br>AD               | +6.9 |
| CAB | Crooked     | McKay's Bluff<br>Cave (NC)              | Tibia                     | 411057 | 350 ± 30    | -20.7 | 500-310             | 1450-1640<br>AD               | +5.1 |
| CAB | Crooked     | McKay's Bluff<br>Cave (NC)              | Femur                     | 411059 | 380 ± 30    | -20.7 | 505-425,<br>395-320 | 1445-1525,<br>1555-1630<br>AD | +4.7 |
| CAB | Crooked     | McKay's Bluff<br>Cave (NC)              | **Femur<br>(UF<br>322960) | 502524 | 380 ± 30    | -20.6 | 505-426,<br>392-318 | 1445-1524,<br>1558-1632<br>AD | +1.5 |



**Table S2.** Pairwise distance of *Geocapromys* samples based on the GBlocks [59] trimmed dataset. KU892768.1 *Geocapromys ingrahami* is the modern sample from East Plana Cay.

|                                                            | UF 322961<br><i>G. ingrahami</i><br>Abaco<br>shotgun | UF 322959<br><i>G. ingrahami</i><br>Abaco<br>enrichment | UF 322948<br><i>G. ingrahami</i><br>Eleuthera<br>shotgun | UF 322947<br><i>G. ingrahami</i><br>Eleuthera<br>enrichment | UF 322960<br><i>G. ingrahami</i><br>Crooked<br>Island<br>shotgun | UF 322949<br><i>G. ingrahami</i><br>Crooked<br>Island<br>enrichment | KU892768.1<br><i>Geocapromys ingrahami</i> | KU892767.1<br><i>Geocapromys brownii</i> |
|------------------------------------------------------------|------------------------------------------------------|---------------------------------------------------------|----------------------------------------------------------|-------------------------------------------------------------|------------------------------------------------------------------|---------------------------------------------------------------------|--------------------------------------------|------------------------------------------|
| UF 322961 <i>G. ingrahami</i><br>Abaco shotgun             | 0.000                                                | 0.000                                                   | 0.002                                                    | 0.003                                                       | 0.020                                                            | 0.021                                                               | 0.024                                      | 0.046                                    |
| UF 322959 <i>G. ingrahami</i><br>Abaco<br>enrichment       | 0.000                                                | 0.000                                                   | 0.002                                                    | 0.003                                                       | 0.020                                                            | 0.021                                                               | 0.024                                      | 0.046                                    |
| UF 322948 <i>G. ingrahami</i><br>Eleuthera<br>shotgun      | 0.002                                                | 0.002                                                   | 0.000                                                    | 0.003                                                       | 0.020                                                            | 0.021                                                               | 0.023                                      | 0.046                                    |
| UF 322947 <i>G. ingrahami</i><br>Eleuthera<br>enrichment   | 0.003                                                | 0.003                                                   | 0.003                                                    | 0.000                                                       | 0.020                                                            | 0.020                                                               | 0.023                                      | 0.046                                    |
| UF 322960 <i>G. ingrahami</i><br>Crooked Island<br>shotgun | 0.020                                                | 0.020                                                   | 0.020                                                    | 0.020                                                       | 0.000                                                            | 0.006                                                               | 0.008                                      | 0.045                                    |

|                                                               |       |       |       |       |       |       |       |       |
|---------------------------------------------------------------|-------|-------|-------|-------|-------|-------|-------|-------|
| UF 322949 <i>G. ingrahami</i><br>Crooked Island<br>enrichment | 0.021 | 0.021 | 0.021 | 0.020 | 0.006 | 0.000 | 0.004 | 0.046 |
| KU892768.1<br><i>Geocapromys ingrahami</i>                    | 0.024 | 0.024 | 0.023 | 0.023 | 0.008 | 0.004 | 0.000 | 0.048 |
| KU892767.1<br><i>Geocapromys brownii</i>                      | 0.046 | 0.046 | 0.046 | 0.046 | 0.045 | 0.046 | 0.048 | 0.000 |

**Table S3.** Samples from GenBank that were included in phylogenetic analyses.

|            |                        |                       |
|------------|------------------------|-----------------------|
| KU892766.1 | <i>Capromys</i>        | <i>pilorides</i>      |
| KU892752.1 | <i>Carterodon</i>      | <i>sulcidens</i>      |
| JX312692.1 | <i>Chinchilla</i>      | <i>lanigera</i>       |
| KU892753.1 | <i>Clyomys</i>         | <i>laticeps</i>       |
| NC20659.1  | <i>Ctenomys</i>        | <i>leucodon</i>       |
| KU762015.1 | <i>Dactylomys</i>      | <i>dactylinus</i>     |
| KU892781.1 | <i>Echimys</i>         | <i>chrysurus</i>      |
| KU892755.1 | <i>Euryzygomatomys</i> | <i>spinosus</i>       |
| KU892767.1 | <i>Geocapromys</i>     | <i>brownii</i>        |
| KU892768.1 | <i>Geocapromys</i>     | <i>ingrahami</i>      |
| KU892779.1 | <i>Hoplomys</i>        | <i>gymnurus</i>       |
| KU892785.1 | <i>Isothrix</i>        | <i>sinnamariensis</i> |
| KU892775.1 | <i>Kannabateomys</i>   | <i>amblyonyx</i>      |
| KU892786.1 | <i>Lonchothrix</i>     | <i>emiliae</i>        |
| KU892782.1 | <i>Makalata</i>        | <i>didelphoides</i>   |
| NC37779.1  | <i>Makalata</i>        | <i>macrura</i>        |
| KU892787.1 | <i>Mesomys</i>         | <i>hispidus</i>       |
| KU892788.1 | <i>Mesomys</i>         | <i>stimulax</i>       |
| MH182628.1 | <i>Myocastor</i>       | <i>coypus</i>         |
| KU892770.1 | <i>Mysateles</i>       | <i>prehensilis</i>    |
| HM544134.1 | <i>Octodon</i>         | <i>degus</i>          |
| KU892756.1 | <i>Phyllomys</i>       | <i>blainvillii</i>    |
| KU892771.1 | <i>Plagiodontia</i>    | <i>aedium</i>         |
| NC39099.1  | <i>Proechimys</i>      | <i>cuvieri</i>        |
| KX688206.1 | <i>Proechimys</i>      | <i>longicaudatus</i>  |
| NC39370.1  | <i>Proechimys</i>      | <i>quadruplicatus</i> |
| NC39444.1  | <i>Proechimys</i>      | <i>simonsi</i>        |
| HM544133.1 | <i>Spalacopus</i>      | <i>cyanus</i>         |
| KU892773.1 | <i>Thrichomys</i>      | <i>apereoides</i>     |
| KU892761.1 | <i>Trinomys</i>        | <i>albispinus</i>     |
| JX312694.1 | <i>Trinomys</i>        | <i>dimidiatus</i>     |
| KU892762.1 | <i>Trinomys</i>        | <i>iheringi</i>       |
| KX650080.1 | <i>Trinomys</i>        | <i>moojeni</i>        |
| KU892763.1 | <i>Trinomys</i>        | <i>paratus</i>        |
| KX655539.1 | <i>Trinomys</i>        | <i>setosus</i>        |
| KU892765.1 | <i>Trinomys</i>        | <i>yonenagae</i>      |
| HM544132.1 | <i>Tympanoctomys</i>   | <i>barrerae</i>       |



**Table S4.** jModelTest [60, 61] output for the mt genome dataset.

| Model      | -lnL      | K  | AIC       | Delta  | Weight    | Cumulative Weight |
|------------|-----------|----|-----------|--------|-----------|-------------------|
| GTR+I+G    | 195901.58 | 94 | 391991.15 | 0      | 1         | 1                 |
| TPM1uf+I+G | 195952.49 | 91 | 392086.99 | 95.84  | 1.55e-021 | 1                 |
| TrN+I+G    | 195978.83 | 81 | 392139.66 | 148.51 | 5.63e-033 | 1                 |

**Figure S1.** MapDamage [58] plots for each of the ancient *Geocapromys ingrahami* samples included in our analyses organized by Bahamian island.

A. Fragment misincorporation plots for samples from Abaco. Left plot is the shotgun sequenced data (UF 322961), right plot is the targeted enrichment sample (UF 322959).

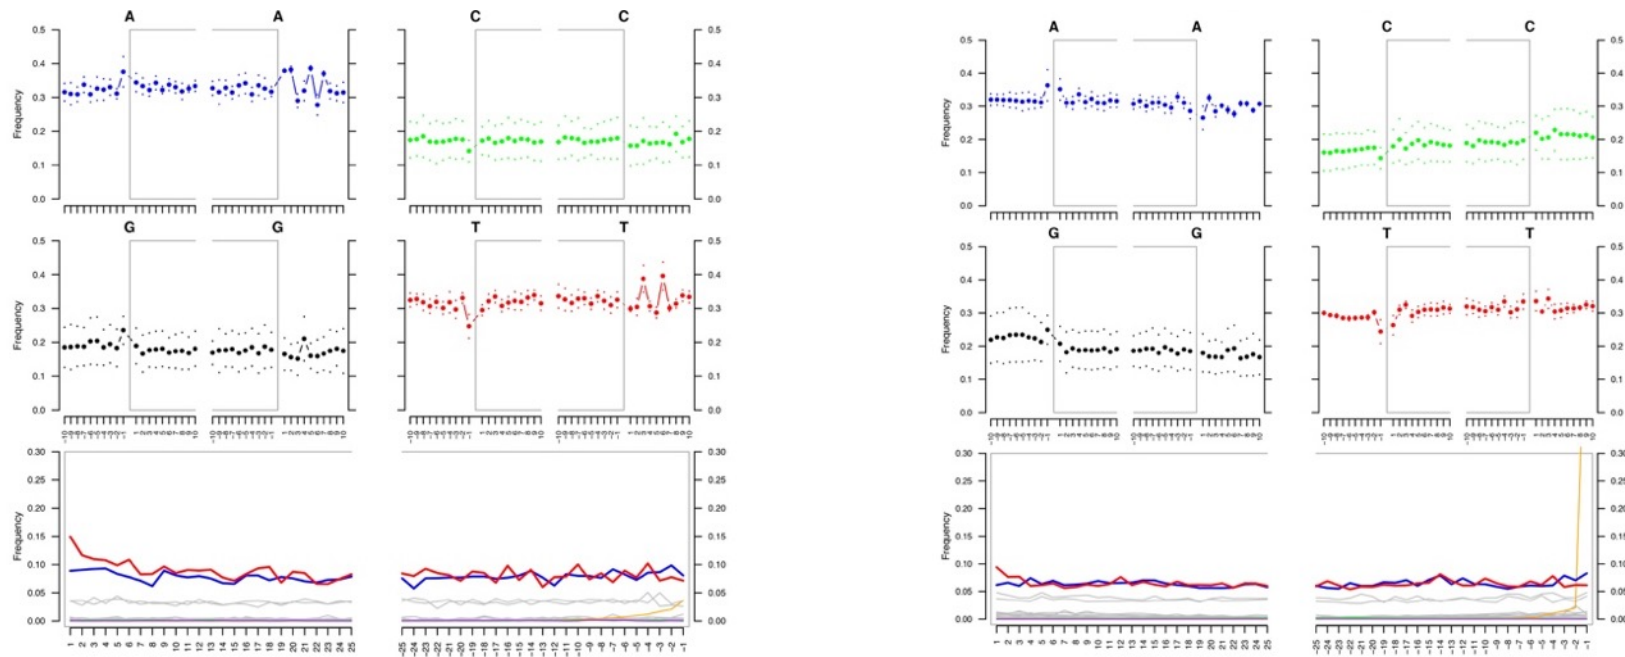

B. Fragment misincorporation plots for samples from Eleuthera. Left plot is the shotgun sequenced data (UF 322948), right plot is the targeted enrichment sample (UF 322947).

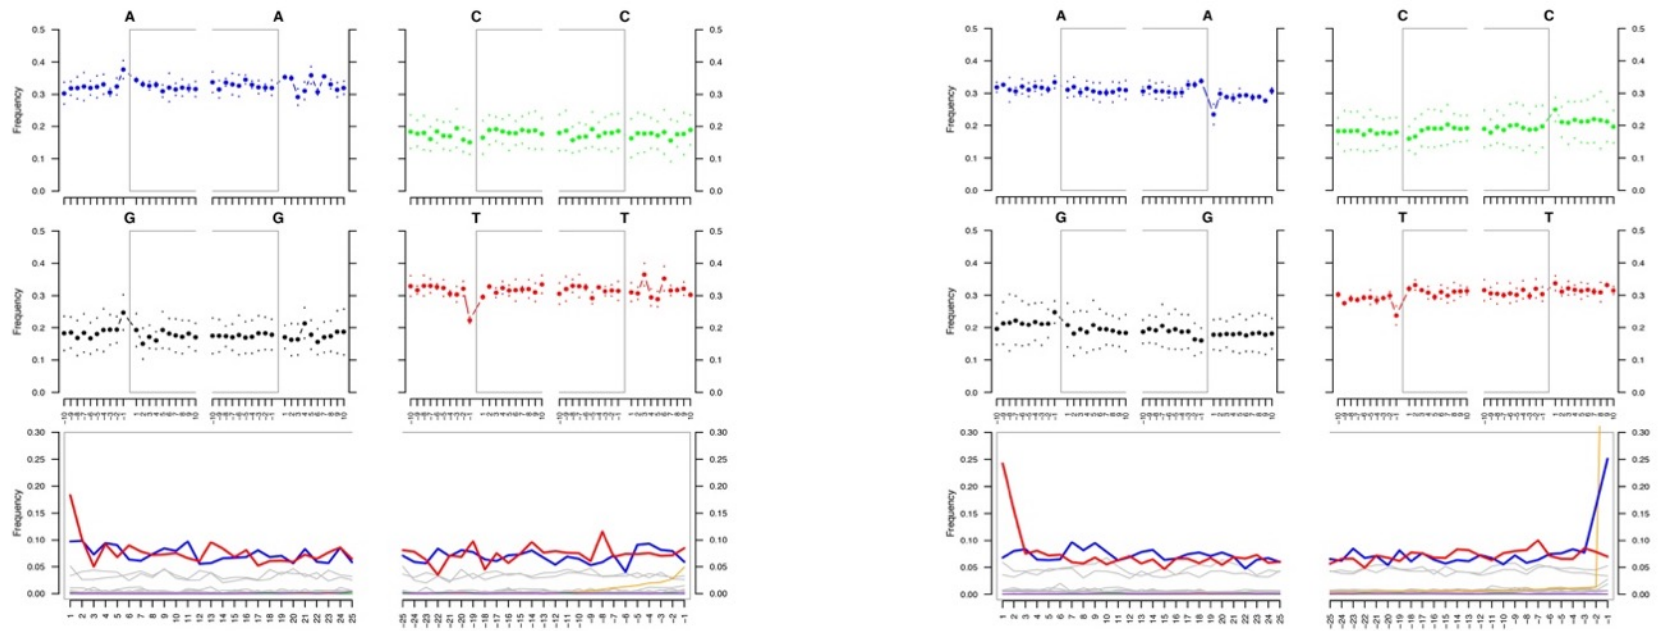

C. Fragment misincorporation plots for samples from Crooked Island. Left plot is the shotgun sequenced data (UF 322960), right plot is the targeted enrichment sample (UF 322949).

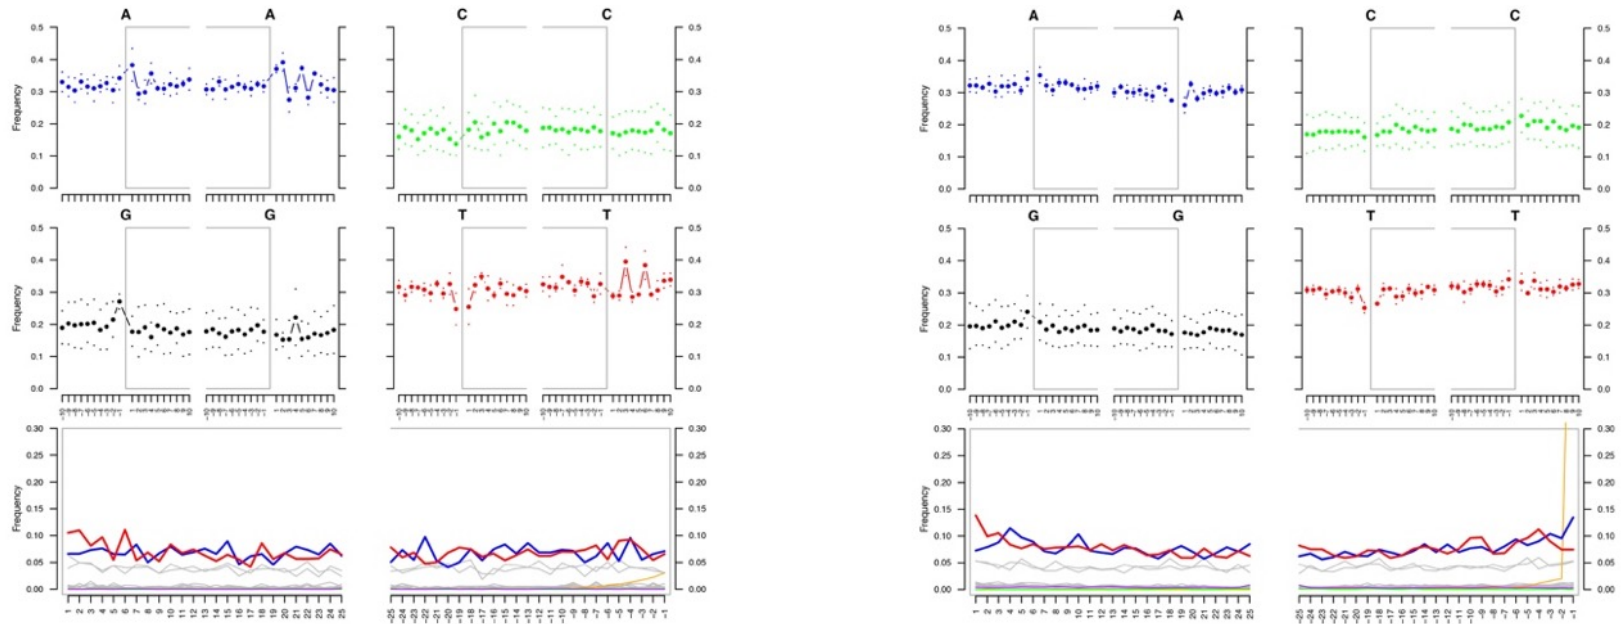

**Figure S2.** Partitioned RAxML [62] phylogeny. Bootstrap support is on the nodes. The *Geocapromys ingrahami* samples used for this study have the island they were sampled from in the label name. Shotgun sequenced samples have a “1” in the label, target enriched samples have a “2” in the label. LBB, Little Bahama Bank; GBB, Great Bahama Bank; CAB, Crooked-Acklins Bank.

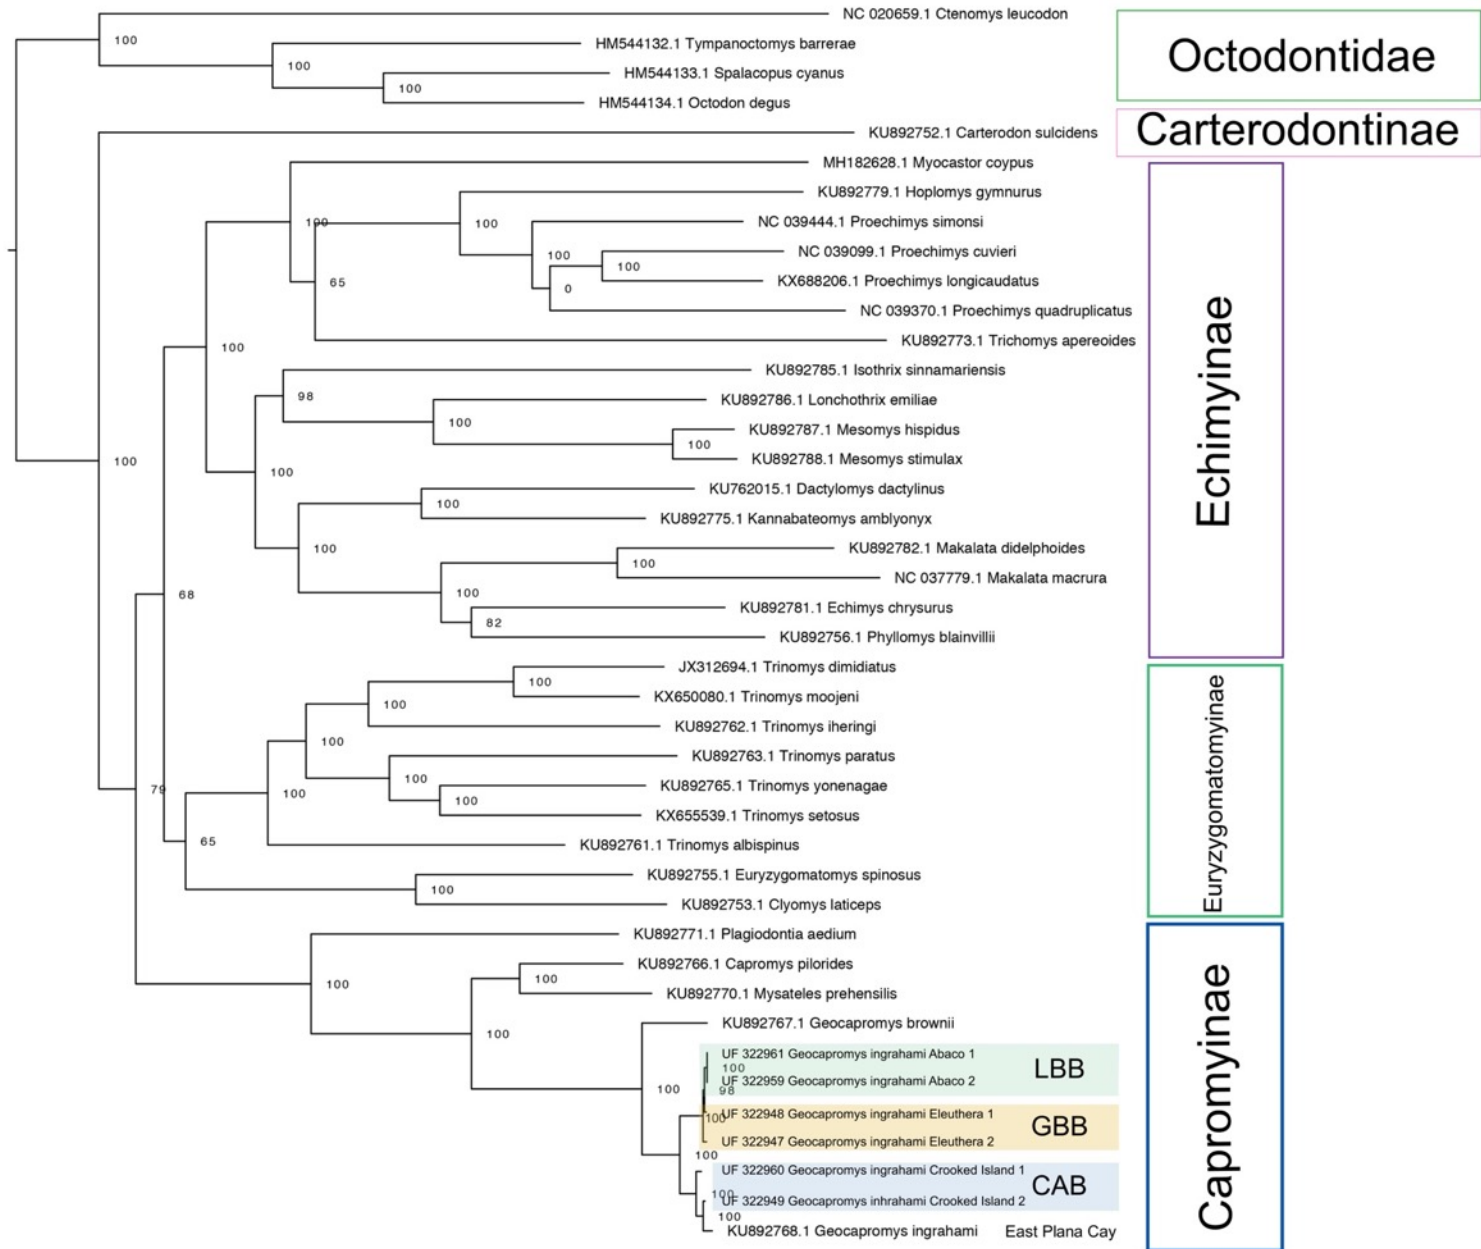

**Figure S3.** BEAST2 [63] phylogeny with the 95% highest posterior density divergence time represented in millions of years on the nodes in parentheses followed by the median divergence time. The median divergence time for *Geocapromys ingrahami* is represented in Figure 3. The BEAST2 [63] phylogeny presented in the main text is a cropped version of this phylogeny. The Miocene Epoch (23 – 5.3 mya) is indicated by the purple box. The Pliocene Epoch (5.3 – 2.6 mya) is indicated by the white box. The Pleistocene Epoch 2.6 Ma to ~12,000 years ago is light blue. The Holocene Epoch began at the end of Pleistocene.

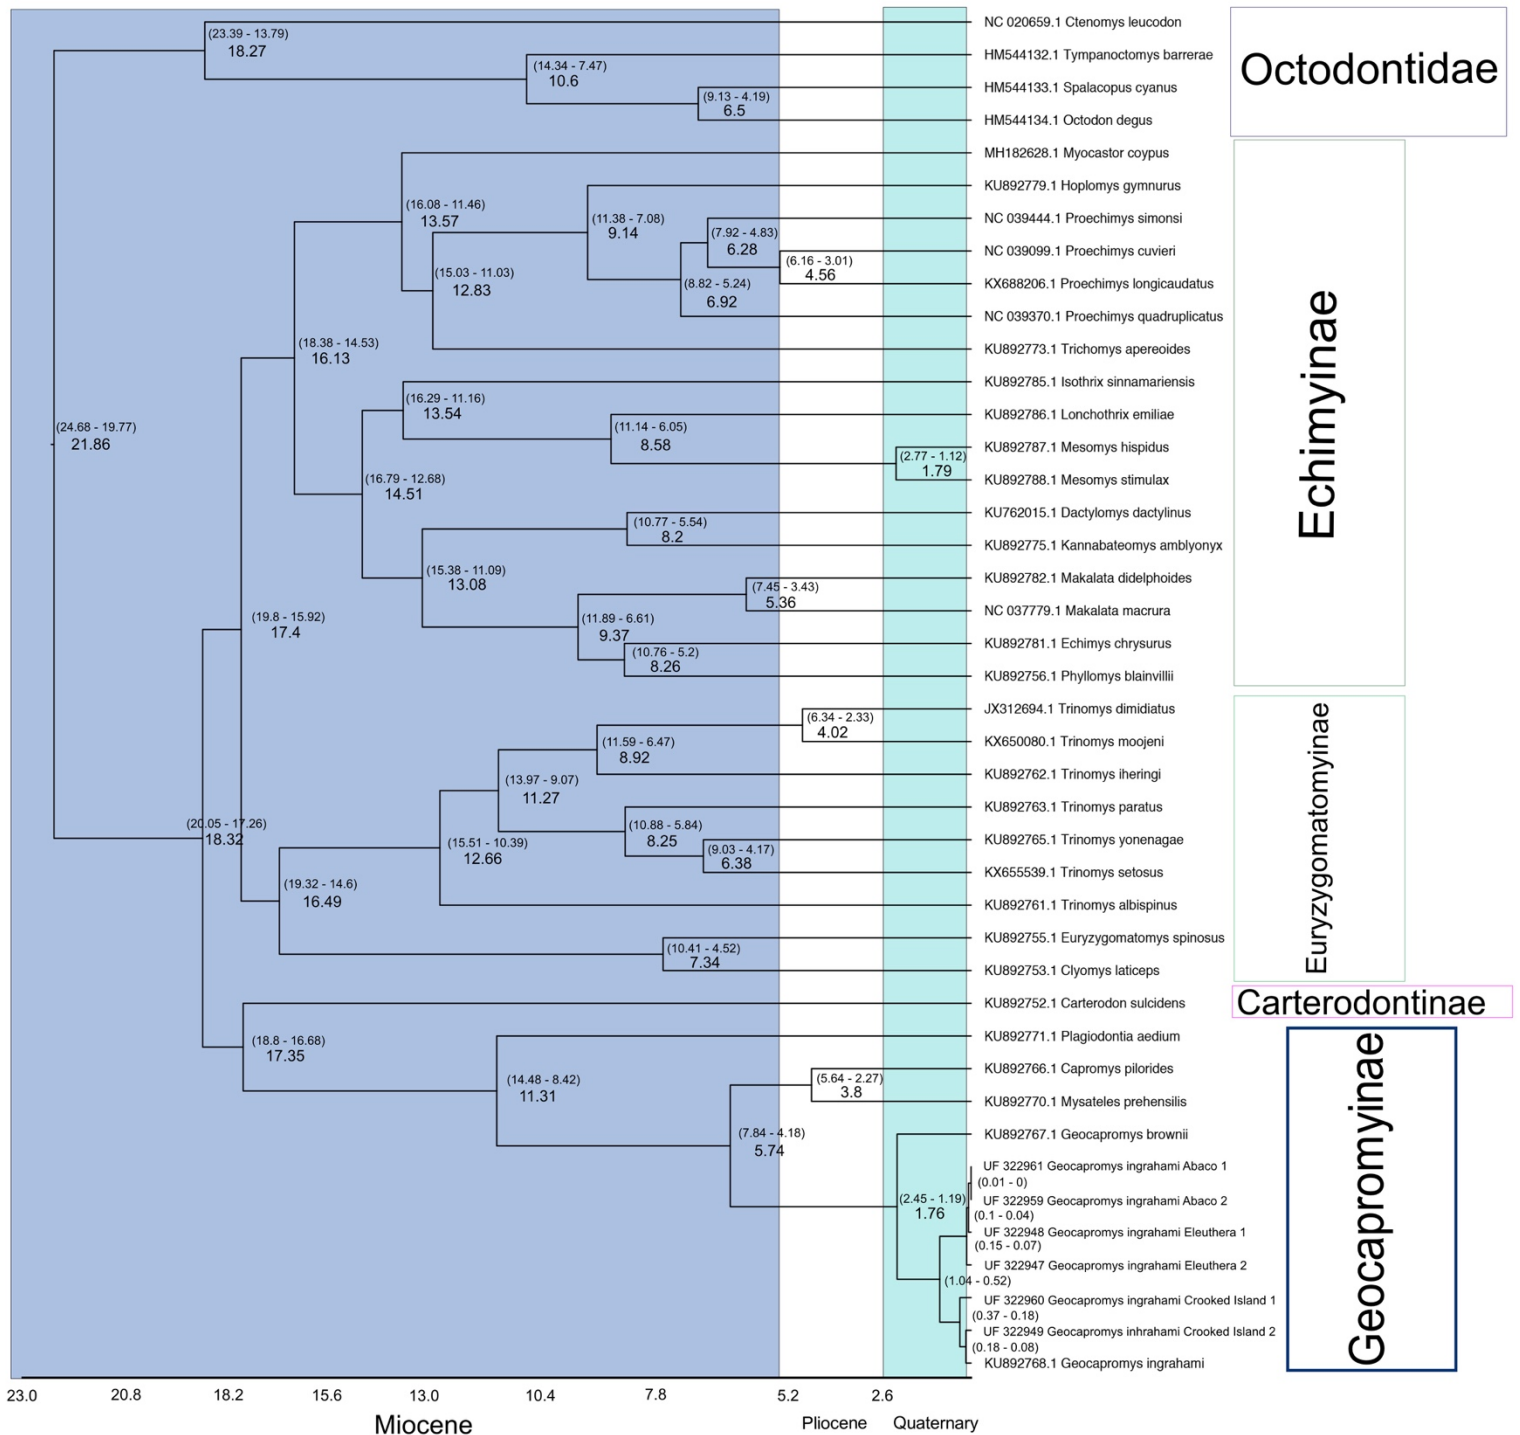

**Figure S4.** BEAST2 [63] phylogeny with posterior probability on the nodes. The color scheme for geological epochs is the same as Fig. S3.

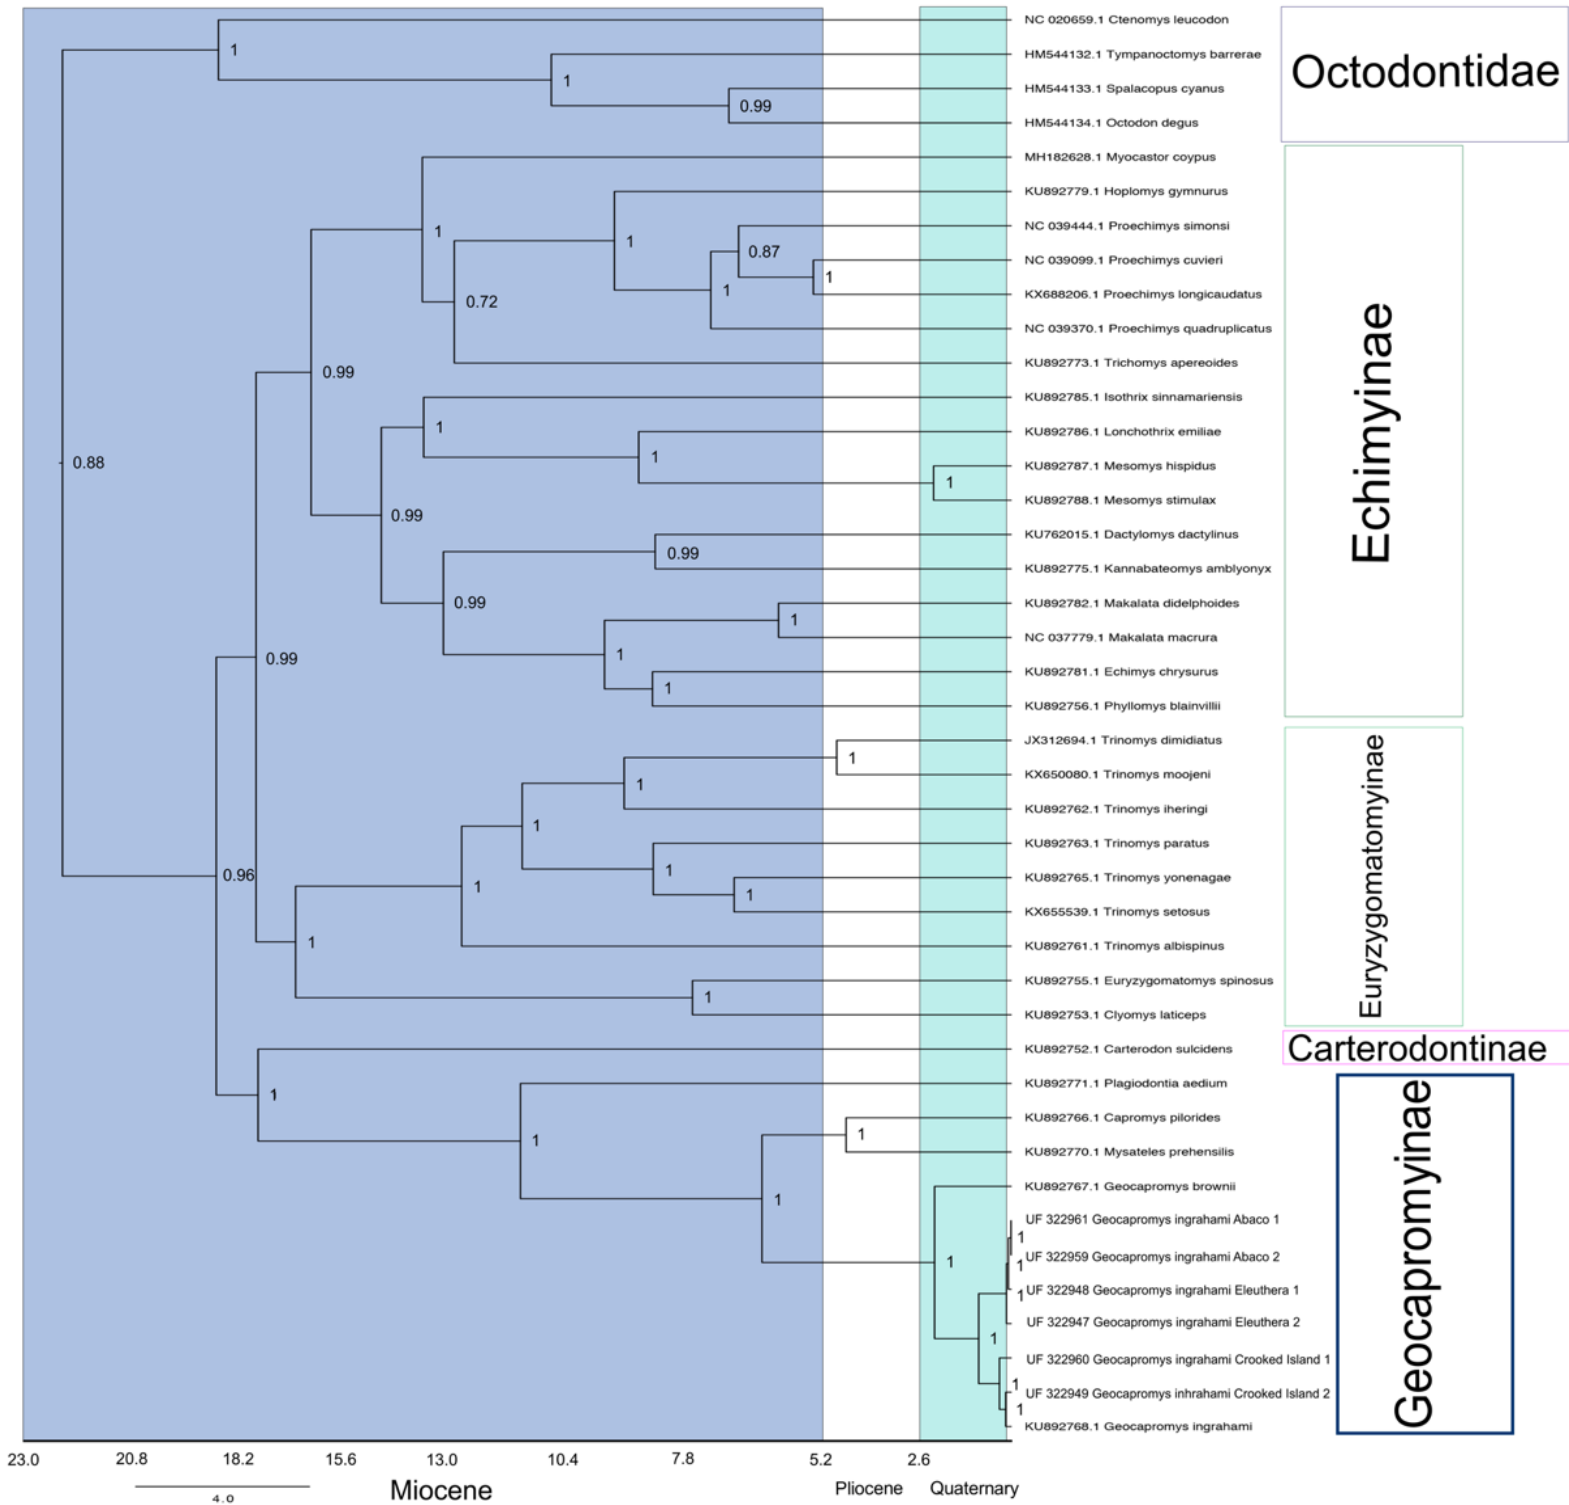

**Supplementary Material References.** (The numbering matches first mention in the main text.)

58. Jónsson, H., Ginolhac, A., Schubert, M., Johnson, P. L. F. & Orlando, L. mapDamage2.0: fast approximate Bayesian estimates of ancient DNA damage parameters. *Bioinformatics* **29**, 1682–1684 (2013).

59. Castresana J. Selection of conserved blocks from multiple alignments for their use in phylogenetic analysis. *Mol. Biol. Evol.* **17**, 540-552 (2000).

60. Guindon, S. & Gascuel, O. A simple, fast and accurate method to estimate large phylogenies by maximum-likelihood. *Syst. Biol.* **52**, 696-704 (2003).

61. Darriba, D., Taboada, G. L., Doallo, R. & Posada, D. jModelTest 2: more models, new heuristics and parallel computing. *Nat. Methods* **9**, 772 (2012).

62. Stamatakis, A. RAxML Version 8: A tool for phylogenetic analysis and post-analysis of large phylogenies. *Bioinformatics* **30**, 1312-3 (2014).

63. Bouckaert, R. *et al.* BEAST 2.5: An advanced software platform for Bayesian evolutionary analysis. *PLOS Comput. Biol.* **15**, e1006650 (2019).
